# Supplementary material for: An artful and simple synthetic strategy for fabricating low carbon residual porous g-C3N4 with enhanced visible-light photocatalytic properties
Source: Royal Society of Chemistry journal article supplement (doi:10.1039/c6ra18496k), 2016-01-01
Supplement: c6ra18496k1.pdf [file c6ra18496k1.pdf]

## Supporting Information

### **An artful and simple synthetic strategy for fabricating low carbon residual porous g-C<sub>3</sub>N<sub>4</sub> with enhanced visible-light photocatalytic properties**

**Xiaopeng Han,<sup>a</sup> Yuexin Wang,<sup>a</sup> Jianan Lv,<sup>a</sup> Lingru Kong,<sup>a</sup> Li Tian,<sup>a</sup> Xuemei Lu,<sup>a</sup> Jiwei Wang<sup>\*ab</sup> and Xiaoxing Fan<sup>\*ab</sup>**

<sup>a</sup> School of Physics, Liaoning University, Shenyang, 110036. P. R. China, E-mail: [xxfan@lnu.edu.cn](mailto:xxfan@lnu.edu.cn);

<sup>b</sup> Liaoning Key Laboratory of Semiconductor Light Emitting and Photocatalytic Materials, Liaoning University, Shenyang 110036, P. R. China, E-mail: [jiweiwang6688@yahoo.com](mailto:jiweiwang6688@yahoo.com).

Table S1. Effects of acetic acid content on the textural properties of the acetic acid mediated g-C<sub>3</sub>N<sub>4</sub>.

| sample  | S <sub>BET</sub> (m <sup>2</sup> g <sup>-1</sup> ) | Pore volume (cm <sup>3</sup> g <sup>-1</sup> ) | Pore size (nm) |
|---------|----------------------------------------------------|------------------------------------------------|----------------|
| g-CN-0  | 9                                                  | 0.073                                          | 20.382         |
| g-CNA-0 | 51                                                 | 0.207                                          | 20.390         |
| g-CNA-1 | 99                                                 | 0.430                                          | 20.377         |
| g-CNA-2 | 112                                                | 0.490                                          | 18.631         |
| g-CN-3  | 12                                                 | 0.193                                          | 18.625         |
| g-CNA-3 | 126                                                | 0.546                                          | 20.374         |
| g-CNA-4 | 74                                                 | 0.292                                          | 20.450         |

Table S2. C/N atomic ratio of samples.

|     | g-CN-1 | g-CNA-1 | g-CN-2 | g-CNA-2 | g-CN-4 | g-CNA-4 |
|-----|--------|---------|--------|---------|--------|---------|
| C/N | 0.67   | 0.67    | 0.68   | 0.67    | 0.69   | 0.68    |

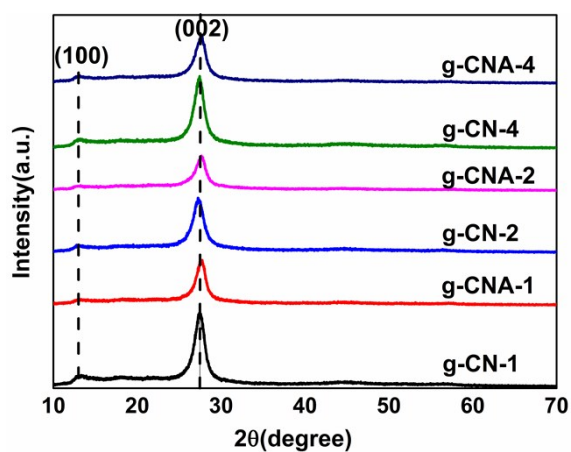

Figure S1. XRD patterns of g-CN-1, g-CNA-1, g-CN-2, g-CNA-2, g-CN-4 and g-CNA-4.

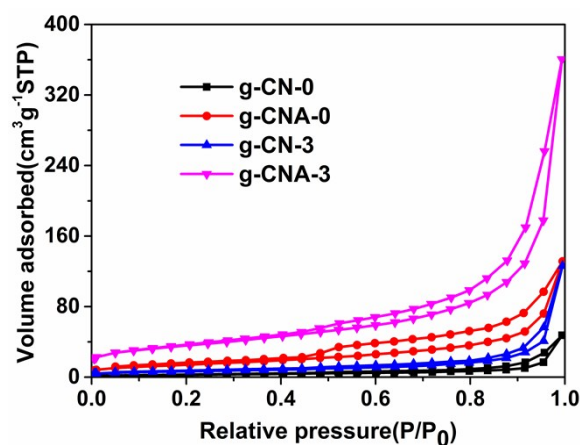

Figure S2. Nitrogen adsorption-desorption isotherm of g-CN-0, g-CNA-0, g-CN-3 and g-CNA-3.

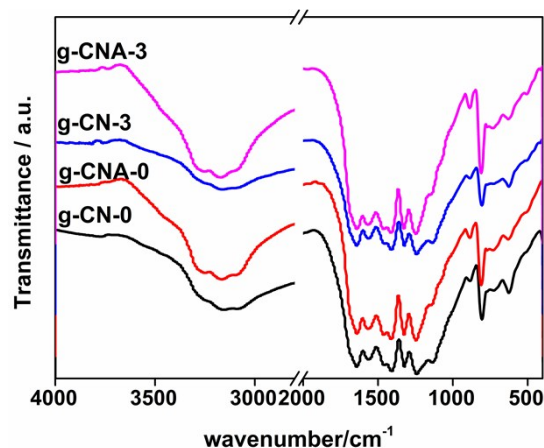

Figure S3. FT-IR spectra of g-CN-0, g-CNA-0, g-CN-3 and g-CNA-3.

FT-IR spectra were utilized to confirm the molecular structure of all the samples. The characteristic IR spectrum of the g-CNA is similar to that of the bulk material. The strong absorption peak around  $700\text{--}800\text{ cm}^{-1}$  can be observed and assigned to the bending vibration mode of CN heterocycles, while the peak centered at  $810\text{ cm}^{-1}$  is the characteristic plane bending vibration mode of the triazine units<sup>2</sup>. The peaks in the region from  $900\text{ to }1800\text{ cm}^{-1}$  can be attributed to either trigonal C–N(–C)–C (full condensation) or bridging C–NH–C units.<sup>3</sup> The broad peak located at  $3000\text{--}3500\text{ cm}^{-1}$  is attributed to the residual N–H and the O–H bands, associated with the uncondensed amino groups and adsorbed  $\text{H}_2\text{O}$  molecules, respectively.

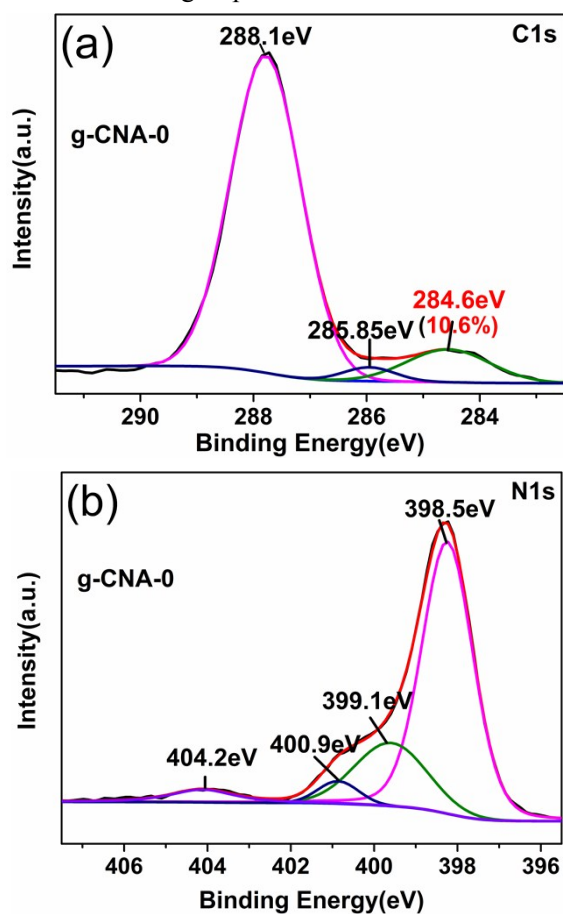

Figure S4. XPS spectra of (a) C 1s spectra of g-CNA-0 and (b) N 1s spectra of g-CNA-0.

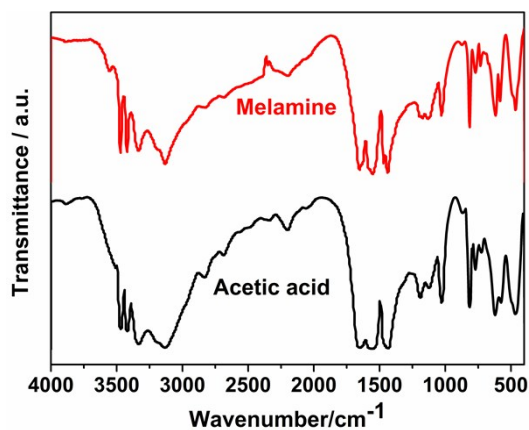

Figure S5. FT-IR of acetic acid mediated melamine.

Compared to FTIR of acetic acid from the previous literature <sup>1</sup>, no characteristic peak of acetic acid or appears. But some characteristic peak of acetic acid mediated melamine weakened. These phenomenon indicate that a small quantity of acetic acid combined with melamine.

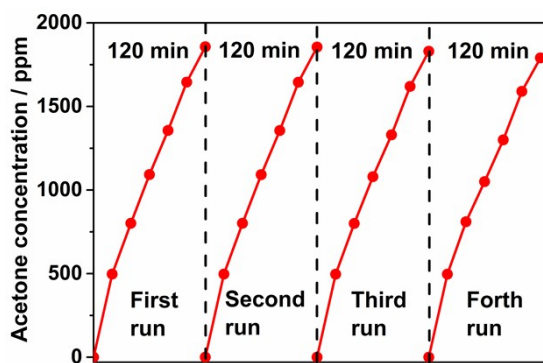

Figure S6. Four-run recycling test of g-CNA-3.

#### REFERENCE

1. W. A. Larish, *Dissertations & Theses - Gradworks*, 2014.
2. Z. Zhao, Y. Sun, F. Dong, Y. Zhang and H. Zhao, *RSC Adv.*, 2015, 5, 39549-39556.
3. P. Niu, G. Liu and H.-M. Cheng, *The Journal of Physical Chemistry C*, 2012, 116, 11013-11018.
